# Supplementary material for: Elevated lipoprotein (a) levels are associated with the acute myocardial infarction in patients with normal low-density lipoprotein cholesterol levels
Source: PubMed Central journal article supplement (PMC6449519; doi:10.1042/bsr20182096), 2019-04-05
Supplement: bsr-39-bsr20182096_Supp1.pdf [file bsr-39-bsr20182096_Supp1.pdf]

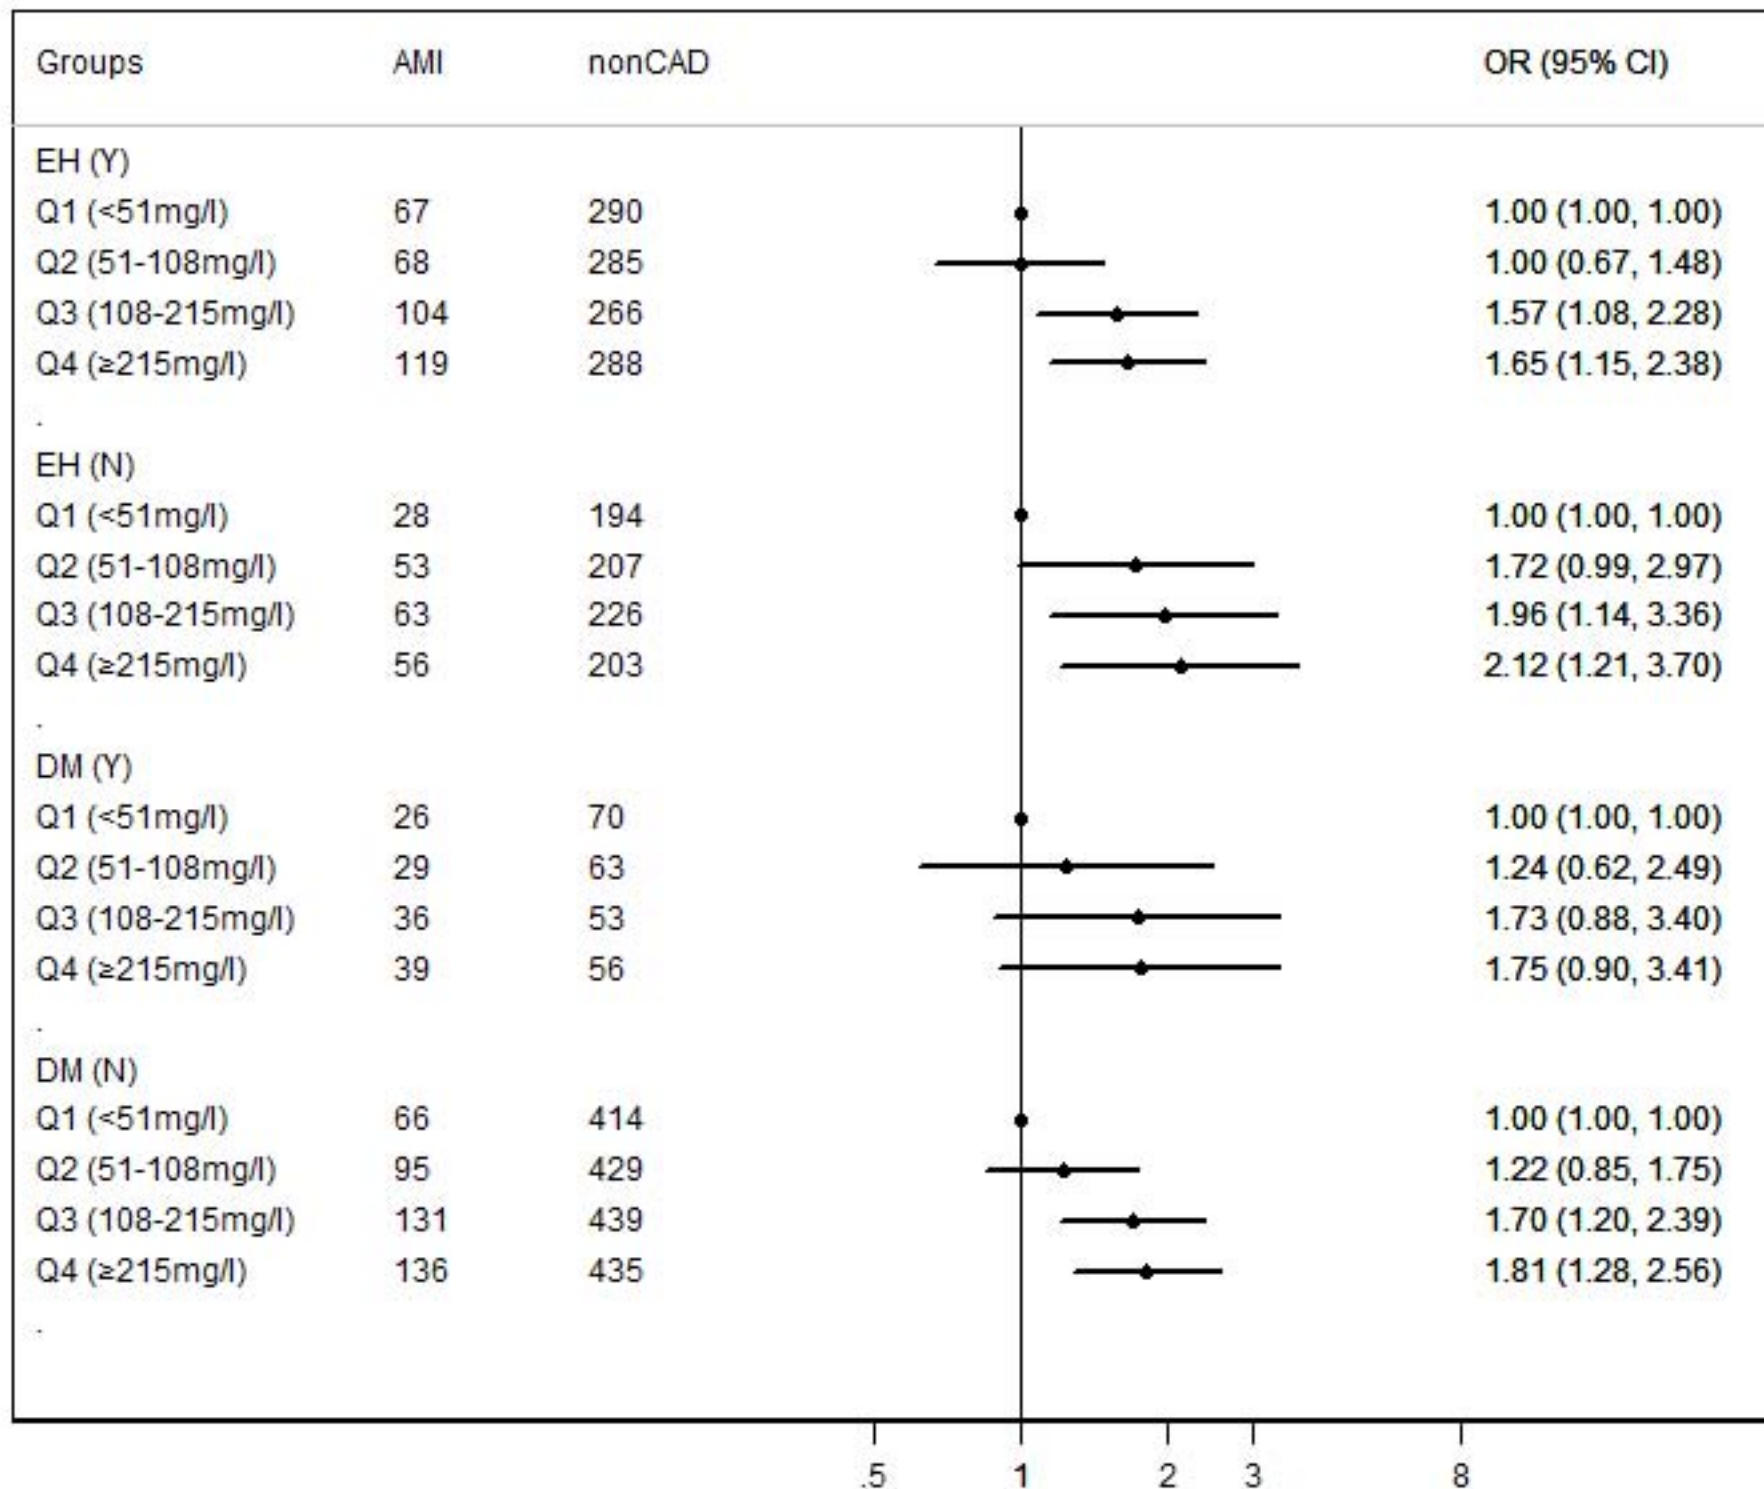

**Supplemental Table 1. The relationship between Lp(a) and the severity of AMI**

| Variables     | single-vessel<br>(n=229) | two-vessel<br>(n=189) | three-vessel<br>(n=140) | <i>P</i> |
|---------------|--------------------------|-----------------------|-------------------------|----------|
| Age, year     | 61.07± 10.01             | 63.86± 10.81          | 64.38± 9.31             | 0.002    |
| TC, mmol/l    | 4.26± 0.73               | 4.32± 0.74            | 4.25± 0.77              | 0.608    |
| TG, mmol/l    | 1.38 (1.01-2.03)         | 1.41 (0.98-2.06)      | 1.42 (1.01-1.89)        | 0.908    |
| HDL-C, mmol/l | 1.09± 0.31               | 1.06± 0.29            | 1.04± 0.29              | 0.313    |
| LDL-C, mmol/l | 2.51± 0.54               | 2.57± 0.48            | 2.52± 0.56              | 0.439    |
| Lp(a), mg/l   | 133 (64.5-255)           | 128 (79.0-230.5)      | 148 (80.3-315.8)        | 0.173    |

TC, total cholesterol; TG, triglyceride; HDL-C, high-density lipoprotein cholesterol; LDL-C, low-density lipoprotein cholesterol

**Supplemental Table 2. Unadjusted and adjusted multivariable logistic regression of associations of Lp(a) with AMI**

|                    | Q1           |          | Q2                  |          | Q3                  |                  | Q4                  |                  |
|--------------------|--------------|----------|---------------------|----------|---------------------|------------------|---------------------|------------------|
|                    | OR (95%CI)   | <i>P</i> | OR (95%CI)          | <i>P</i> | OR (95%CI)          | <i>P</i>         | OR (95%CI)          | <i>P</i>         |
| <b>Total</b>       |              |          |                     |          |                     |                  |                     |                  |
| Model 1            | 1.000 (Ref.) | -        | 1.253 (0.931-1.685) | 0.136    | 1.729 (1.305-2.291) | <b>&lt;0.001</b> | 1.816 (1.373-2.402) | <b>&lt;0.001</b> |
| Model 2            | 1.000 (Ref.) | -        | 1.290(0.944-1.763)  | 0.110    | 1.756(1.303-2.366)  | <b>&lt;0.001</b> | 1.863(1.385-2.506)  | <b>&lt;0.001</b> |
| Model 3            | 1.000 (Ref.) | -        | 1.213(0.884-1.665)  | 0.231    | 1.666(1.230-2.257)  | <b>&lt;0.001</b> | 1.769(1.305-2.398)  | <b>&lt;0.001</b> |
| <b>Gender</b>      |              |          |                     |          |                     |                  |                     |                  |
| <b>Male</b>        |              |          |                     |          |                     |                  |                     |                  |
| Model 1            | 1.000 (Ref.) | -        | 1.235(0.874-1.746)  | 0.231    | 1.734(1.247-2.410)  | <b>0.001</b>     | 1.841(1.324-2.558)  | <b>&lt;0.001</b> |
| Model 2            | 1.000 (Ref.) | -        | 1.315(0.920-1.879)  | 0.132    | 1.753(1.248-2.463)  | <b>0.001</b>     | 1.853(1.320-2.603)  | <b>&lt;0.001</b> |
| Model 3            | 1.000 (Ref.) | -        | 1.251(0.872-1.795)  | 0.224    | 1.673(1.184-2.364)  | <b>0.004</b>     | 1.779(1.256-2.520)  | <b>0.001</b>     |
| <b>Female</b>      |              |          |                     |          |                     |                  |                     |                  |
| Model 1            | 1.000 (Ref.) | -        | 1.226(0.650-2.313)  | 0.528    | 1.593(0.872-2.910)  | 0.130            | 1.752(0.971-3.160)  | 0.062            |
| Model 2            | 1.000 (Ref.) | -        | 1.130(0.591-2.162)  | 0.711    | 1.773(0.955-3.293)  | 0.070            | 1.874 (1.022-3.437) | <b>0.042</b>     |
| Model 3            | 1.000 (Ref.) | -        | 1.019(0.526-1.973)  | 0.956    | 1.666(0.888-3.125)  | 0.112            | 1.683(0.903-3.137)  | 0.101            |
| <b>Age</b>         |              |          |                     |          |                     |                  |                     |                  |
| <b>Early-onset</b> |              |          |                     |          |                     |                  |                     |                  |
| Model 1            | 1.000 (Ref.) | -        | 1.131(0.713-1.795)  | 0.601    | 1.214(0.776-1.898)  | 0.396            | 1.232(0.789-1.923)  | 0.359            |
| Model 2            | 1.000 (Ref.) | -        | 1.115(0.685-1.816)  | 0.661    | 1.157(0.718-1.865)  | 0.550            | 1.311(0.817-2.104)  | 0.262            |
| Model 3            | 1.000 (Ref.) | -        | 1.054(0.644-1.726)  | 0.835    | 1.049(0.645-1.706)  | 0.847            | 1.238(0.762-2.013)  | 0.388            |
| <b>Late-onset</b>  |              |          |                     |          |                     |                  |                     |                  |
| Model 1            | 1.000 (Ref.) | -        | 1.334(0.904-1.969)  | 0.146    | 2.126(1.472-3.072)  | <b>&lt;0.001</b> | 2.271(1.575-3.273)  | <b>&lt;0.001</b> |
| Model 2            | 1.000 (Ref.) | -        | 1.453(0.966-2.184)  | 0.073    | 2.290(1.552-3.378)  | <b>&lt;0.001</b> | 2.371(1.612-3.486)  | <b>&lt;0.001</b> |
| Model 3            | 1.000 (Ref.) | -        | 1.370(0.906-2.073)  | 0.136    | 2.249(1.511-3.348)  | <b>&lt;0.001</b> | 2.266(1.526-3.365)  | <b>&lt;0.001</b> |

AMI, acute myocardial infarction; Q, quartile; OR, odds ratio; CI, confidence interval.

Model 1, crude model without adjustment for any factors; Model 2, adjustment for age, gender, smoking, EH, DM;

Model, adjustment for factors in model 2 plus TC, HDL-C, LDL-C and ApoA.

Bold values indicate statistical significance.

**Supplemental Table 3. Unadjusted and adjusted multivariable logistic regression of associations of Lp(a) with AMI in EH and DM subgroups**

|           | Q1           |   | Q2                 |       | Q3                 |                  | Q4                 |                  |
|-----------|--------------|---|--------------------|-------|--------------------|------------------|--------------------|------------------|
|           | OR (95%CI)   | P | OR (95%CI)         | P     | OR (95%CI)         | P                | OR (95%CI)         | P                |
| <b>EH</b> |              |   |                    |       |                    |                  |                    |                  |
| <b>N</b>  |              |   |                    |       |                    |                  |                    |                  |
| Model 1   | 1.000 (Ref.) | - | 1.774(1.078-2.919) | 0.024 | 1.931(1.189-3.136) | <b>0.008</b>     | 1.911(1.166-3.134) | <b>0.010</b>     |
| Model 2   | 1.000 (Ref.) | - | 1.709(0.997-2.930) | 0.051 | 1.936(1.140-3.290) | <b>0.015</b>     | 1.994(1.161-3.425) | <b>0.012</b>     |
| Model 3   | 1.000 (Ref.) | - | 1.717(0.993-2.969) | 0.053 | 1.962(1.145-3.364) | <b>0.014</b>     | 2.118(1.214-3.697) | <b>0.008</b>     |
| <b>Y</b>  |              |   |                    |       |                    |                  |                    |                  |
| Model 1   | 1.000 (Ref.) | - | 1.033(0.710-1.502) | 0.866 | 1.692(1.193-2.400) | <b>0.003</b>     | 1.788(1.272-2.515) | <b>0.001</b>     |
| Model 2   | 1.000 (Ref.) | - | 1.086(0.736-1.602) | 0.679 | 1.698(1.180-2.444) | <b>0.004</b>     | 1.817(1.273-2.594) | <b>0.001</b>     |
| Model 3   | 1.000 (Ref.) | - | 0.999(0.673-1.483) | 0.996 | 1.571(1.084-2.279) | <b>0.017</b>     | 1.653(1.147-2.381) | <b>0.007</b>     |
| <b>DM</b> |              |   |                    |       |                    |                  |                    |                  |
| <b>N</b>  |              |   |                    |       |                    |                  |                    |                  |
| Model 1   | 1.000 (Ref.) | - | 1.389(0.987-1.955) | 0.060 | 1.872(1.353-2.590) | <b>&lt;0.001</b> | 1.961(1.419-2.710) | <b>&lt;0.001</b> |
| Model 2   | 1.000 (Ref.) | - | 1.311(0.919-1.870) | 0.135 | 1.814(1.293-2.546) | <b>0.001</b>     | 1.948(1.390-2.728) | <b>&lt;0.001</b> |
| Model 3   | 1.000 (Ref.) | - | 1.220(0.852-1.748) | 0.278 | 1.698(1.204-2.394) | <b>0.003</b>     | 1.811(1.283-2.555) | <b>0.001</b>     |
| <b>Y</b>  |              |   |                    |       |                    |                  |                    |                  |
| Model 1   | 1.000 (Ref.) | - | 0.996(0.531-1.869) | 0.990 | 1.640(0.895-3.004) | 0.109            | 1.681(0.927-3.041) | 0.087            |
| Model 2   | 1.000 (Ref.) | - | 1.251(0.638-2.453) | 0.515 | 1.599(0.836-3.058) | 0.156            | 1.660(0.876-3.146) | 0.120            |
| Model 3   | 1.000 (Ref.) | - | 1.244(0.623-2.486) | 0.536 | 1.730(0.879-3.405) | 0.112            | 1.753(0.902-3.406) | 0.098            |

EH, essential hypertension; DM, diabetes mellitus. N, no; Y, yes; OR, odds ratio; CI, confidence interval. Q, quartile;

Bold values indicate statistical significance.

**Supplemental Table 4. Unadjusted and adjusted multivariable logistic regression of associations of Lp(a) with AMI in different cutoff values**

|                    | Cut-off 1          |                  | Cut-off 2          |              |
|--------------------|--------------------|------------------|--------------------|--------------|
|                    | OR(95%CI)          | <i>P</i>         | OR(95%CI)          | <i>P</i>     |
| <b>Total</b>       |                    |                  |                    |              |
| Model 1            | 1.421(1.172-1.724) | <b>&lt;0.001</b> | 1.446(1.143-1.830) | <b>0.002</b> |
| Model 2            | 1.413(1.151-1.735) | <b>0.001</b>     | 1.465(1.139-1.885) | <b>0.003</b> |
| Model 3            | 1.418(1.150-1.748) | <b>0.001</b>     | 1.521(1.179-1.963) | <b>0.001</b> |
| <b>Gender</b>      |                    |                  |                    |              |
| <b>Male</b>        |                    |                  |                    |              |
| Model 1            | 1.394(1.110-1.751) | <b>0.004</b>     | 1.375(1.035-1.826) | <b>0.028</b> |
| Model 2            | 1.361(1.076-1.721) | <b>0.010</b>     | 1.341(1.001-1.798) | <b>0.049</b> |
| Model 3            | 1.370(1.078-1.740) | <b>0.010</b>     | 1.392(1.034-1.872) | <b>0.029</b> |
| <b>Female</b>      |                    |                  |                    |              |
| Model 1            | 1.473(0.978-2.220) | 0.064            | 1.857(1.166-2.958) | <b>0.009</b> |
| Model 2            | 1.643(1.076-2.510) | <b>0.022</b>     | 1.823(1.120-2.967) | <b>0.016</b> |
| Model 3            | 1.618(1.049-2.393) | <b>0.029</b>     | 1.874(1.142-3.076) | <b>0.013</b> |
| <b>Age</b>         |                    |                  |                    |              |
| <b>Early-onset</b> |                    |                  |                    |              |
| Model 1            | 1.143(0.823-1.586) | 0.426            | 1.186(0.794-1.771) | 0.406        |
| Model 2            | 1.149(0.810-1.630) | 0.435            | 1.224(0.797-1.881) | 0.356        |
| Model 3            | 1.137(0.797-1.623) | 0.479            | 1.251(0.807-1.940) | 0.317        |
| <b>Late-onset</b>  |                    |                  |                    |              |
| Model 1            | 1.594(1.252-2.029) | <b>&lt;0.001</b> | 1.631(1.215-2.190) | <b>0.001</b> |
| Model 2            | 1.586(1.230-2.046) | <b>&lt;0.001</b> | 1.623(1.184-2.223) | <b>0.003</b> |
| Model 3            | 1.598(1.232-2.073) | <b>&lt;0.001</b> | 1.694(1.233-2.327) | <b>0.001</b> |

AMI, acute myocardial infarction; OR, odds ratio; CI, confidence interval.

Bold values indicate statistical significance.

Model 1, crude model without adjustment any factors; Model 2, adjustment for age, gender, smoking, EH, DM;

Model, adjustment for factors in Model 2 plus TC, HDL-C, LDL-C and ApoA.
